# Supplementary material for: MicroRNA Expression Profiling in Behçet's Disease
Source: J Immunol Res. 2018 May 7;2018:2405150. doi: 10.1155/2018/2405150 (PMC5964440; doi:10.1155/2018/2405150)
Supplement: Supplementary 1 — Supplementary Table 1: miRNAs significantly modulated in BD. [file 2405150.f1.xlsx]

## Sheet: Suppl. 1 SENZA BD2 fc1.5 p0.01 
Supplementary table 1. Modulated miRNAs in BD
Probe Set Name	ID	Transcript ID(Array Design)	Fold Change	P-val	FDR P-val	Accession
MIMAT0005865_st	20506795	hsa-miR-1202	39.61	1.75e-06	0.0003	MIMAT0005865
MIMAT0019019_st	20518879	hsa-miR-4485	29.81	3.56e-07	0.0002	MIMAT0019019
MIMAT0009199_st	20501209	hsa-miR-365a-5p	16.49	1.48e-05	0.001	MIMAT0009199
MIMAT0005873_st	20506803	hsa-miR-1208	14.67	2.07e-06	0.0004	MIMAT0005873
HBII-382_s_st	20534245	HBII-382	13.13	3.32e-08	5.9e-05	HBII-382
mgU2-25-61_s_st	20538289	mgU2-25-61	13.13	3.32e-08	5.9e-05	mgU2-25-61
MIMAT0020601_st	20520349	hsa-miR-1273f	12.95	1.7e-06	0.0003	MIMAT0020601
MIMAT0027526_st	20525587	hsa-miR-6813-5p	12.75	6.71e-06	0.0006	MIMAT0027526
MIMAT0022942_st	20506776	hsa-miR-1229-5p	10.52	1.06e-06	0.0003	MIMAT0022942
MIMAT0027504_st	20525565	hsa-miR-6802-5p	10.44	2.15e-05	0.0013	MIMAT0027504
MIMAT0024616_st	20524053	hsa-miR-6132	10.26	2.52e-05	0.0014	MIMAT0024616
MIMAT0005572_st	20506763	hsa-miR-1225-5p	9.55	1.75e-05	0.0011	MIMAT0005572
MIMAT0019041_st	20518901	hsa-miR-4505	9.46	1.72e-07	0.0001	MIMAT0019041
MIMAT0005898_st	20506837	hsa-miR-1246	8.88	0.0004	0.0089	MIMAT0005898
MIMAT0028211_st	20526861	hsa-miR-7150	8.65	3.42e-07	0.0002	MIMAT0028211
MIMAT0022967_st	20517833	hsa-miR-3620-5p	8.36	2.66e-06	0.0004	MIMAT0022967
MIMAT0023710_st	20523017	hsa-miR-6085	8.28	6.14e-07	0.0003	MIMAT0023710
MIMAT0027398_st	20525459	hsa-miR-6749-5p	8.17	2.22e-05	0.0013	MIMAT0027398
MIMAT0016889_st	20517717	hsa-miR-4327	8.04	2.77e-06	0.0004	MIMAT0016889
MIMAT0019018_st	20518878	hsa-miR-4484	7.75	4.96e-06	0.0005	MIMAT0019018
MIMAT0019069_st	20518931	hsa-miR-4530	7.68	1.25e-07	0.0001	MIMAT0019069
MIMAT0027464_st	20525525	hsa-miR-6782-5p	7.49	1.49e-05	0.001	MIMAT0027464
HBI-61_x_st	20534215	HBI-61	7.47	5.48e-06	0.0005	HBI-61
MIMAT0019045_st	20518905	hsa-miR-4508	7.37	5.89e-06	0.0006	MIMAT0019045
mgU6-47_st	20538292	mgU6-47	7	1.91e-05	0.0012	mgU6-47
MIMAT0009447_st	20510799	hsa-miR-1972	6.97	4.56e-05	0.0021	MIMAT0009447
MIMAT0022286_st	20521825	hsa-miR-5585-3p	6.94	2.65e-06	0.0004	MIMAT0022286
MIMAT0019027_st	20518887	hsa-miR-4492	6.85	1.17e-06	0.0003	MIMAT0019027
MIMAT0019071_st	20518933	hsa-miR-4532	6.72	9.31e-07	0.0003	MIMAT0019071
MIMAT0030990_st	20529773	hsa-miR-8063	6.65	0.0004	0.0082	MIMAT0030990
MIMAT0031016_st	20529799	hsa-miR-8089	6.52	4.97e-06	0.0005	MIMAT0031016
MIMAT0027500_st	20525561	hsa-miR-6800-5p	6.45	5.88e-05	0.0024	MIMAT0027500
MIMAT0016901_st	20517730	hsa-miR-4271	6.36	3e-05	0.0016	MIMAT0016901
MIMAT0027458_st	20525519	hsa-miR-6779-5p	6.26	4.95e-08	5.9e-05	MIMAT0027458
MIMAT0026622_st	20504364	hsa-miR-619-5p	6.17	0.0001	0.0042	MIMAT0026622
MIMAT0019044_st	20518904	hsa-miR-4507	6.16	6.17e-06	0.0006	MIMAT0019044
MIMAT0004609_st	20500781	hsa-miR-149-3p	6.05	1.09e-06	0.0003	MIMAT0004609
MIMAT0002824_st	20503815	hsa-miR-498	6.05	3.79e-05	0.0019	MIMAT0002824
MIMAT0025844_st	20525383	hsa-miR-6716-5p	6	1.02e-05	0.0008	MIMAT0025844
MIMAT0022721_st	20506839	hsa-miR-1247-3p	5.74	1.65e-05	0.0011	MIMAT0022721
MIMAT0027506_st	20525567	hsa-miR-6803-5p	5.7	3.37e-06	0.0005	MIMAT0027506
MI0015885_st	20536496	hsa-mir-4281	5.63	3.84e-06	0.0005	MI0015885
MIMAT0023116_st	20522180	hsa-miR-5739	5.53	0.0002	0.0053	MIMAT0023116
MIMAT0022938_st	20506006	hsa-miR-937-5p	5.47	3.22e-06	0.0005	MIMAT0022938
MIMAT0025854_st	20525394	hsa-miR-6722-3p	5.45	2.46e-05	0.0014	MIMAT0025854
MIMAT0027404_st	20525465	hsa-miR-6752-5p	5.25	6.23e-06	0.0006	MIMAT0027404
MIMAT0015036_st	20515585	hsa-miR-3162-5p	5.24	4.2e-05	0.002	MIMAT0015036
MIMAT0016851_st	20517679	hsa-miR-4299	5.09	5.7e-05	0.0023	MIMAT0016851
MIMAT0027640_st	20525701	hsa-miR-6870-5p	5.08	1.98e-07	0.0001	MIMAT0027640
MIMAT0023713_st	20523020	hsa-miR-6088	5.04	4.13e-06	0.0005	MIMAT0023713
MIMAT0009448_st	20510800	hsa-miR-1973	4.68	4.85e-06	0.0005	MIMAT0009448
MIMAT0027540_st	20525601	hsa-miR-6820-5p	4.67	2.83e-06	0.0004	MIMAT0027540
MIMAT0018068_st	20517899	hsa-miR-3648	4.65	2.19e-05	0.0013	MIMAT0018068
MIMAT0018985_st	20518843	hsa-miR-3135b	4.64	5.41e-06	0.0005	MIMAT0018985
MIMAT0019777_st	20519496	hsa-miR-4688	4.62	1.1e-05	0.0009	MIMAT0019777
MIMAT0019778_st	20519497	hsa-miR-4689	4.61	6.24e-05	0.0025	MIMAT0019778
MIMAT0027494_st	20525555	hsa-miR-6797-5p	4.61	0.0004	0.0087	MIMAT0027494
MIMAT0007892_st	20509237	hsa-miR-1915-3p	4.57	4.36e-06	0.0005	MIMAT0007892
MIMAT0021021_st	20520198	hsa-miR-5001-5p	4.57	0.0003	0.0068	MIMAT0021021
MIMAT0024597_st	20524034	hsa-miR-6124	4.57	0.0004	0.0086	MIMAT0024597
MIMAT0018987_st	20518845	hsa-miR-4463	4.56	3.4e-06	0.0005	MIMAT0018987
MI0022645_x_st	20537544	hsa-mir-6800	4.54	0.0002	0.0053	MI0022645
HBII-419_st	20534246	HBII-419	4.51	3.67e-06	0.0005	HBII-419
MIMAT0010313_st	20504586	hsa-miR-762	4.48	9.03e-07	0.0003	MIMAT0010313
MIMAT0019077_st	20518940	hsa-miR-1587	4.47	7.8e-05	0.0028	MIMAT0019077
MI0022645_st	20537543	hsa-mir-6800	4.31	0.0002	0.0051	MI0022645
MIMAT0023252_st	20522537	hsa-miR-5787	4.27	1.51e-06	0.0003	MIMAT0023252
MIMAT0015080_st	20515638	hsa-miR-3196	4.23	3.16e-07	0.0002	MIMAT0015080
MIMAT0019707_st	20519425	hsa-miR-4646-5p	4.16	0.0003	0.0063	MIMAT0019707
MIMAT0027488_st	20525549	hsa-miR-6794-5p	4.13	2.11e-06	0.0004	MIMAT0027488
MIMAT0030415_st	20529132	hsa-miR-1273h-5p	4.09	2.48e-05	0.0014	MIMAT0030415
MIMAT0030414_st	20529131	hsa-miR-4433b-3p	3.98	1.19e-05	0.0009	MIMAT0030414
MIMAT0025856_st	20525396	hsa-miR-6724-5p	3.98	8.82e-05	0.003	MIMAT0025856
MIMAT0019903_st	20519626	hsa-miR-4758-5p	3.92	1.18e-05	0.0009	MIMAT0019903
MIMAT0027355_st	20525416	hsa-miR-6727-5p	3.88	1.15e-06	0.0003	MIMAT0027355
MIMAT0019953_st	20519676	hsa-miR-2467-3p	3.85	1.27e-05	0.0009	MIMAT0019953
MIMAT0019775_st	20519493	hsa-miR-4687-3p	3.79	3.44e-05	0.0018	MIMAT0019775
MIMAT0027387_st	20525448	hsa-miR-6743-5p	3.78	0.0002	0.006	MIMAT0027387
MIMAT0027623_st	20525684	hsa-miR-6861-5p	3.77	7.19e-07	0.0003	MIMAT0027623
MIMAT0024598_st	20524035	hsa-miR-6125	3.76	2.01e-06	0.0004	MIMAT0024598
MIMAT0019743_st	20519461	hsa-miR-4667-5p	3.75	4.03e-05	0.002	MIMAT0019743
MIMAT0027616_st	20525677	hsa-miR-6858-5p	3.74	1.82e-05	0.0011	MIMAT0027616
MIMAT0004794_st	20504289	hsa-miR-551b-5p	3.74	0.0001	0.0037	MIMAT0004794
MIMAT0003308_st	20504391	hsa-miR-638	3.69	4.12e-06	0.0005	MIMAT0003308
MIMAT0013802_st	20514163	hsa-miR-2861	3.68	6.6e-05	0.0026	MIMAT0013802
MIMAT0018076_st	20517907	hsa-miR-3656	3.66	5.47e-06	0.0005	MIMAT0018076
MIMAT0030996_st	20529779	hsa-miR-8069	3.6	5.21e-06	0.0005	MIMAT0030996
MIMAT0028113_st	20526174	hsa-miR-7108-5p	3.54	1.1e-05	0.0009	MIMAT0028113
MIMAT0019721_st	20519439	hsa-miR-4655-5p	3.52	4.55e-05	0.0021	MIMAT0019721
HBI-6_x_st	20534216	HBI-6	3.52	0.0004	0.0085	HBI-6
MIMAT0019956_st	20519679	hsa-miR-4787-5p	3.51	1.03e-06	0.0003	MIMAT0019956
MIMAT0027482_st	20525543	hsa-miR-6791-5p	3.44	8.77e-05	0.003	MIMAT0027482
MIMAT0019871_st	20519592	hsa-miR-4741	3.43	0.0002	0.0053	MIMAT0019871
MIMAT0023712_st	20523019	hsa-miR-6087	3.4	1.27e-06	0.0003	MIMAT0023712
MI0022704_st	20537603	hsa-mir-6858	3.33	7.98e-06	0.0007	MI0022704
MIMAT0027512_st	20525573	hsa-miR-6806-5p	3.32	7.32e-05	0.0027	MIMAT0027512
MIMAT0019715_st	20519433	hsa-miR-4651	3.29	4.13e-05	0.002	MIMAT0019715
MIMAT0019885_st	20519607	hsa-miR-4749-5p	3.28	4.18e-05	0.002	MIMAT0019885
MIMAT0027496_st	20525557	hsa-miR-6798-5p	3.25	3.96e-05	0.002	MIMAT0027496
MIMAT0018993_st	20518851	hsa-miR-4466	3.24	4.77e-06	0.0005	MIMAT0018993
MIMAT0022977_st	20519405	hsa-miR-4632-5p	3.2	5.62e-05	0.0023	MIMAT0022977
MIMAT0028125_st	20526186	hsa-miR-7114-5p	3.2	0.0002	0.005	MIMAT0028125
MIMAT0019053_st	20518913	hsa-miR-4516	3.19	1.22e-05	0.0009	MIMAT0019053
MIMAT0027442_st	20525503	hsa-miR-6771-5p	3.16	5.08e-05	0.0023	MIMAT0027442
MIMAT0018087_st	20517919	hsa-miR-3665	3.13	2.59e-06	0.0004	MIMAT0018087
MIMAT0004948_st	20505790	hsa-miR-885-3p	3.12	5.11e-05	0.0023	MIMAT0004948
MIMAT0027359_st	20525420	hsa-miR-6729-5p	3.09	1.98e-06	0.0004	MIMAT0027359
MIMAT0019337_st	20519048	hsa-miR-3960	3.07	4.49e-07	0.0002	MIMAT0019337
MIMAT0024599_st	20524036	hsa-miR-6126	3.06	5.38e-05	0.0023	MIMAT0024599
MIMAT0019022_st	20518882	hsa-miR-4488	3.02	1.37e-05	0.0009	MIMAT0019022
MIMAT0018943_st	20518800	hsa-miR-4428	2.98	0.0002	0.0052	MIMAT0018943
MIMAT0023714_st	20523021	hsa-miR-6089	2.97	1.51e-06	0.0003	MIMAT0023714
U15A_st	20538137	U15A	2.96	3.38e-06	0.0005	U15A
MIMAT0019229_st	20518629	hsa-miR-3940-5p	2.96	4.61e-05	0.0021	MIMAT0019229
MIMAT0027498_st	20525559	hsa-miR-6799-5p	2.95	0.0003	0.0074	MIMAT0027498
MI0019310_st	20537225	hsa-mir-5703	2.88	4.27e-05	0.002	MI0019310
MIMAT0005582_st	20506774	hsa-miR-1228-5p	2.88	7.31e-05	0.0027	MIMAT0005582
MIMAT0019754_st	20519472	hsa-miR-4672	2.88	0.0003	0.0072	MIMAT0019754
MIMAT0030019_st	20528733	hsa-miR-7704	2.87	3.44e-06	0.0005	MIMAT0030019
MIMAT0019793_st	20519512	hsa-miR-4698	2.81	0.0001	0.0042	MIMAT0019793
MIMAT0027412_st	20525473	hsa-miR-6756-5p	2.8	2.38e-06	0.0004	MIMAT0027412
MIMAT0023715_st	20523022	hsa-miR-6090	2.79	4.53e-06	0.0005	MIMAT0023715
MI0020366_s_st	20537261	hsa-mir-6089-1	2.77	0.0003	0.0075	MI0020366
MI0023563_s_st	20537862	hsa-mir-6089-2	2.77	0.0003	0.0075	MI0023563
MIMAT0027484_st	20525545	hsa-miR-6792-5p	2.72	6.37e-05	0.0025	MIMAT0027484
mgU6-53_st	20538295	mgU6-53	2.66	9.94e-07	0.0003	mgU6-53
MIMAT0005922_st	20506865	hsa-miR-1268a	2.62	3.1e-05	0.0016	MIMAT0005922
MIMAT0027038_st	20519494	hsa-miR-1343-5p	2.62	5.68e-05	0.0023	MIMAT0027038
MIMAT0019867_st	20519588	hsa-miR-4738-3p	2.62	0.0003	0.0076	MIMAT0019867
MIMAT0028115_st	20526176	hsa-miR-7109-5p	2.61	0.0002	0.0045	MIMAT0028115
MIMAT0019756_st	20519474	hsa-miR-4674	2.52	0.0003	0.0079	MIMAT0019756
MIMAT0018949_st	20518807	hsa-miR-4433-3p	2.51	0.0004	0.0091	MIMAT0018949
MIMAT0007881_st	20509224	hsa-miR-1908-5p	2.5	7.15e-05	0.0027	MIMAT0007881
U3-2B_s_st	20538325	U3-2B	2.49	1.28e-05	0.0009	U3-2B
U3-2_s_st	20538326	U3-2	2.49	1.28e-05	0.0009	U3-2
U3-3_s_st	20538327	U3-3	2.49	1.28e-05	0.0009	U3-3
U3-4_s_st	20538328	U3-4	2.49	1.28e-05	0.0009	U3-4
MIMAT0027638_st	20525699	hsa-miR-6869-5p	2.49	8.04e-05	0.0029	MIMAT0027638
MIMAT0025472_st	20525017	hsa-miR-6508-5p	2.47	5.22e-05	0.0023	MIMAT0025472
MIMAT0022946_st	20506787	hsa-miR-1237-5p	2.43	7.54e-05	0.0028	MIMAT0022946
U3_s_st	20538175	U3	2.41	2.26e-05	0.0013	U3
MIMAT0022941_st	20506771	hsa-miR-1227-5p	2.4	0.0001	0.0033	MIMAT0022941
MIMAT0026612_st	20503885	hsa-miR-504-3p	2.36	0.0001	0.0038	MIMAT0026612
mgU6-53_x_st	20538296	mgU6-53	2.35	5.9e-06	0.0006	mgU6-53
MIMAT0027550_st	20525611	hsa-miR-6825-5p	2.31	0.0003	0.0072	MIMAT0027550
MIMAT0022943_st	20506781	hsa-miR-1233-5p	2.28	5.6e-05	0.0023	MIMAT0022943
mgU6-53B_st	20538293	mgU6-53B	2.23	0.0004	0.0086	mgU6-53B
MIMAT0019739_st	20519457	hsa-miR-4665-5p	2.18	3.55e-05	0.0018	MIMAT0019739
MIMAT0027472_st	20525533	hsa-miR-6786-5p	2.14	6.21e-05	0.0025	MIMAT0027472
MIMAT0018925_st	20518782	hsa-miR-1268b	2.1	0.0004	0.0081	MIMAT0018925
MI0016817_st	20538319	hsa-mir-4466	2.08	0.0001	0.0042	MI0016817
MIMAT0003237_st	20504295	hsa-miR-572	2.03	0.0002	0.0059	MIMAT0003237
MIMAT0026486_st	20501277	hsa-miR-328-5p	2.01	0.0005	0.0097	MIMAT0026486
MIMAT0019849_st	20519570	hsa-miR-4728-5p	1.99	0.0002	0.0044	MIMAT0019849
MI0022635_st	20537533	hsa-mir-6790	1.93	0.0005	0.01	MI0022635
MIMAT0027478_st	20525539	hsa-miR-6789-5p	1.9	0.0004	0.0089	MIMAT0027478
MIMAT0027538_st	20525599	hsa-miR-6819-5p	1.86	0.0002	0.0049	MIMAT0027538
MIMAT0027430_st	20525491	hsa-miR-6765-5p	1.86	0.0005	0.0095	MIMAT0027430
U94_st	20538274	U94	1.85	0.0005	0.0098	U94
MIMAT0030420_st	20529137	hsa-miR-7845-5p	1.82	0.0004	0.0081	MIMAT0030420
MIMAT0027365_st	20525426	hsa-miR-6732-5p	1.81	3.62e-05	0.0018	MIMAT0027365
MI0005762_st	20535691	hsa-mir-940	1.63	0.0001	0.0043	MI0005762
MIMAT0000065_st	20500119	hsa-let-7d-5p	-1.55	0.0003	0.0066	MIMAT0000065
MI0015903_x_st	20536515	hsa-mir-500b	-1.55	0.0005	0.0095	MI0015903
ACA45_st	20532678	ACA45	-1.6	0.0002	0.0057	ACA45
MI0000086_st	20534374	hsa-mir-28	-1.61	0.0003	0.0075	MI0000086
ACA36B_s_st	20532659	ACA36B	-1.7	0.0001	0.0042	ACA36B
MI0006442_s_st	20535919	hsa-mir-664a	-1.7	0.0001	0.0042	MI0006442
U78_x_st	20538253	U78	-1.75	0.0004	0.0082	U78
MIMAT0000256_st	20500444	hsa-miR-181a-5p	-1.76	0.0005	0.0095	MIMAT0000256
ACA45_x_st	20532679	ACA45	-1.78	0.0001	0.0034	ACA45
MIMAT0018937_st	20518794	hsa-miR-378g	-1.81	0.0005	0.01	MIMAT0018937
MIMAT0000449_st	20500778	hsa-miR-146a-5p	-1.87	9.49e-05	0.0032	MIMAT0000449
MIMAT0000703_st	20501197	hsa-miR-361-5p	-1.88	2.18e-05	0.0013	MIMAT0000703
MI0000760_st	20534830	hsa-mir-361	-1.91	4.14e-05	0.002	MI0000760
MIMAT0004780_st	20503908	hsa-miR-532-3p	-1.92	9.35e-05	0.0032	MIMAT0004780
MIMAT0002871_st	20503876	hsa-miR-500a-3p	-1.92	0.0003	0.0075	MIMAT0002871
MIMAT0004775_st	20503880	hsa-miR-502-3p	-1.95	0.0002	0.0046	MIMAT0004775
MIMAT0004748_st	20502123	hsa-miR-423-5p	-2	0.0002	0.0052	MIMAT0004748
U18C_x_st	20538144	U18C	-2.05	6.58e-05	0.0026	U18C
MI0001445_st	20535082	hsa-mir-423	-2.05	0.0002	0.0054	MI0001445
MIMAT0004774_st	20503878	hsa-miR-501-3p	-2.05	0.0003	0.0067	MIMAT0004774
MIMAT0003886_st	20504580	hsa-miR-769-5p	-2.06	0.0003	0.0063	MIMAT0003886
MIMAT0000617_st	20501036	hsa-miR-200c-3p	-2.12	9.64e-05	0.0032	MIMAT0000617
MIMAT0000692_st	20501182	hsa-miR-30e-5p	-2.17	0.0004	0.0081	MIMAT0000692
MIMAT0000085_st	20500158	hsa-miR-28-5p	-2.2	2.94e-05	0.0016	MIMAT0000085
MIMAT0005948_st	20506896	hsa-miR-664a-5p	-2.3	0.0001	0.0044	MIMAT0005948
U61_st	20538215	U61	-2.36	0.0002	0.0057	U61
HBII-99_st	20534337	HBII-99	-2.47	0.0002	0.0057	HBII-99
MIMAT0004810_st	20504379	hsa-miR-629-5p	-2.48	6.98e-05	0.0027	MIMAT0004810
MIMAT0000244_st	20500422	hsa-miR-30c-5p	-2.49	3.83e-05	0.0019	MIMAT0000244
MIMAT0000751_st	20501276	hsa-miR-330-3p	-2.53	0.0004	0.0089	MIMAT0000751
MIMAT0004559_st	20500449	hsa-miR-181c-3p	-2.54	0.0002	0.0059	MIMAT0004559
MI0000542_x_st	20534637	hsa-mir-320a	-2.57	0.0001	0.0037	MI0000542
MIMAT0000460_st	20500797	hsa-miR-194-5p	-2.6	7.57e-05	0.0028	MIMAT0000460
MIMAT0001340_st	20502124	hsa-miR-423-3p	-2.61	6.4e-05	0.0025	MIMAT0001340
MIMAT0004502_st	20500159	hsa-miR-28-3p	-2.66	1.94e-05	0.0012	MIMAT0004502
MIMAT0004585_st	20500716	hsa-let-7i-3p	-2.74	0.0005	0.0095	MIMAT0004585
MIMAT0000762_st	20501295	hsa-miR-324-3p	-2.77	0.0002	0.0049	MIMAT0000762
MIMAT0010133_st	20511549	hsa-miR-2110	-2.82	5.58e-05	0.0023	MIMAT0010133
MIMAT0003298_st	20504380	hsa-miR-629-3p	-2.86	9.3e-05	0.0032	MIMAT0003298
MIMAT0000083_st	20500154	hsa-miR-26b-5p	-2.88	0.0001	0.0039	MIMAT0000083
MIMAT0004672_st	20501158	hsa-miR-106b-3p	-2.89	6e-06	0.0006	MIMAT0004672
U81_x_st	20538256	U81	-2.92	8.43e-05	0.003	U81
MIMAT0004515_st	20500189	hsa-miR-29b-2-5p	-2.93	0.0002	0.0057	MIMAT0004515
MIMAT0000417_st	20500718	hsa-miR-15b-5p	-2.94	4.39e-06	0.0005	MIMAT0000417
MIMAT0000245_st	20500424	hsa-miR-30d-5p	-2.99	7.24e-07	0.0003	MIMAT0000245
MIMAT0004776_st	20503886	hsa-miR-505-5p	-2.99	0.0002	0.0044	MIMAT0004776
MIMAT0004614_st	20500795	hsa-miR-193a-5p	-3.01	2.76e-05	0.0015	MIMAT0004614
MIMAT0004784_st	20504187	hsa-miR-455-3p	-3.02	5.2e-05	0.0023	MIMAT0004784
MIMAT0000222_st	20500385	hsa-miR-192-5p	-3.06	3.9e-05	0.0019	MIMAT0000222
MIMAT0000438_st	20500758	hsa-miR-152-3p	-3.06	0.0002	0.0046	MIMAT0000438
MIMAT0003294_st	20504372	hsa-miR-625-5p	-3.17	7.4e-06	0.0006	MIMAT0003294
MIMAT0000081_st	20500151	hsa-miR-25-3p	-3.2	1.17e-06	0.0003	MIMAT0000081
MIMAT0004589_st	20500725	hsa-miR-30b-3p	-3.22	5.27e-05	0.0023	MIMAT0004589
MIMAT0006764_st	20509070	hsa-miR-320d	-3.28	9.49e-05	0.0032	MIMAT0006764
MIMAT0002821_st	20503811	hsa-miR-181d-5p	-3.3	3.48e-06	0.0005	MIMAT0002821
MIMAT0018944_st	20518801	hsa-miR-4429	-3.3	0.0003	0.0078	MIMAT0018944
MIMAT0004498_st	20500150	hsa-miR-25-5p	-3.32	1.3e-06	0.0003	MIMAT0004498
MIMAT0000067_st	20500123	hsa-let-7f-5p	-3.34	0.0001	0.0041	MIMAT0000067
MIMAT0022714_st	20504582	hsa-miR-766-5p	-3.35	7.25e-05	0.0027	MIMAT0022714
MIMAT0004700_st	20501292	hsa-miR-331-5p	-3.39	0.0002	0.0049	MIMAT0004700
MIMAT0004674_st	20501161	hsa-miR-30c-1-3p	-3.43	2.18e-05	0.0013	MIMAT0004674
MIMAT0003218_st	20504274	hsa-miR-92b-3p	-3.43	3.61e-05	0.0018	MIMAT0003218
MIMAT0004568_st	20500483	hsa-miR-221-5p	-3.46	0.0002	0.0046	MIMAT0004568
MIMAT0015072_st	20515627	hsa-miR-320e	-3.47	0.0005	0.0096	MIMAT0015072
MIMAT0000087_st	20500162	hsa-miR-30a-5p	-3.74	6.01e-06	0.0006	MIMAT0000087
MIMAT0000076_st	20500141	hsa-miR-21-5p	-3.77	6.95e-05	0.0027	MIMAT0000076
MIMAT0004701_st	20501296	hsa-miR-338-5p	-3.82	0.0002	0.0044	MIMAT0004701
MIMAT0004558_st	20500445	hsa-miR-181a-2-3p	-3.85	9.9e-05	0.0033	MIMAT0004558
MIMAT0004553_st	20500436	hsa-miR-7-1-3p	-3.91	6.42e-06	0.0006	MIMAT0004553
MIMAT0016858_st	20517686	hsa-miR-4306	-3.91	0.0001	0.0039	MIMAT0016858
MIMAT0004749_st	20502126	hsa-miR-424-3p	-4.02	0.0004	0.0089	MIMAT0004749
MIMAT0004682_st	20501198	hsa-miR-361-3p	-4.06	0.0003	0.0075	MIMAT0004682
MI0002468_st	20535133	hsa-mir-484	-4.14	0.0002	0.005	MI0002468
MIMAT0016875_st	20517703	hsa-miR-4323	-4.3	0.0004	0.0093	MIMAT0016875
MIMAT0000280_st	20500488	hsa-miR-223-3p	-4.32	0.0001	0.0043	MIMAT0000280
MIMAT0000227_st	20500395	hsa-miR-197-3p	-4.48	1.29e-05	0.0009	MIMAT0000227
MIMAT0002174_st	20503102	hsa-miR-484	-4.56	0.0003	0.0069	MIMAT0002174
MIMAT0002876_st	20503887	hsa-miR-505-3p	-4.58	5.7e-05	0.0023	MIMAT0002876
MIMAT0004762_st	20503106	hsa-miR-486-3p	-4.67	8.94e-05	0.0031	MIMAT0004762
MIMAT0003888_st	20504583	hsa-miR-766-3p	-4.69	6.05e-05	0.0024	MIMAT0003888
MIMAT0031180_st	20529568	hsa-miR-7977	-4.98	0.0001	0.0039	MIMAT0031180
MIMAT0022259_st	20521785	hsa-miR-5100	-5.02	0.0003	0.0064	MIMAT0022259
MIMAT0000424_st	20500733	hsa-miR-128-3p	-5.07	8.24e-05	0.0029	MIMAT0000424
MIMAT0005911_st	20506852	hsa-miR-1260a	-5.24	1.55e-05	0.001	MIMAT0005911
MIMAT0000759_st	20501291	hsa-miR-148b-3p	-5.43	0.0004	0.0084	MIMAT0000759
MIMAT0000752_st	20501278	hsa-miR-328-3p	-5.63	8.25e-05	0.0029	MIMAT0000752
MIMAT0000461_st	20500798	hsa-miR-195-5p	-5.8	1.87e-05	0.0012	MIMAT0000461
MIMAT0000066_st	20500121	hsa-let-7e-5p	-5.98	0.0002	0.0052	MIMAT0000066
MIMAT0004514_st	20500187	hsa-miR-29b-1-5p	-6.81	0.0004	0.0093	MIMAT0004514
MIMAT0003297_st	20504378	hsa-miR-628-3p	-6.83	9.44e-05	0.0032	MIMAT0003297
MIMAT0004507_st	20500170	hsa-miR-92a-1-5p	-6.84	4.38e-06	0.0005	MIMAT0004507
MIMAT0000419_st	20500723	hsa-miR-27b-3p	-7.22	0.0001	0.0041	MIMAT0000419
MIMAT0000756_st	20501285	hsa-miR-326	-7.39	0.0005	0.0095	MIMAT0000756
MIMAT0010214_st	20504561	hsa-miR-151b	-8.07	0.0002	0.0061	MIMAT0010214
MIMAT0004819_st	20504553	hsa-miR-671-3p	-8.16	6.72e-06	0.0006	MIMAT0004819
MIMAT0000757_st	20501287	hsa-miR-151a-3p	-8.47	0.0004	0.0084	MIMAT0000757
MIMAT0015041_st	20515591	hsa-miR-1260b	-9.73	0.0002	0.0049	MIMAT0015041
MIMAT0016916_st	20517745	hsa-miR-4286	-10.54	0.0001	0.0039	MIMAT0016916
MIMAT0002177_st	20503105	hsa-miR-486-5p	-17.98	0.0003	0.0066	MIMAT0002177
MIMAT0000232_st	20500400	hsa-miR-199a-3p	-21.75	0.0002	0.0049	MIMAT0000232
MIMAT0004563_st	20500458	hsa-miR-199b-3p	-21.75	0.0002	0.0049	MIMAT0004563
MIMAT0000445_st	20500769	hsa-miR-126-3p	-26.32	5.11e-05	0.0023	MIMAT0000445
MIMAT0000437_st	20500755	hsa-miR-145-5p	-26.68	0.0001	0.0037	MIMAT0000437
MIMAT0003249_st	20504312	hsa-miR-584-5p	-51.18	4.42e-05	0.002	MIMAT0003249
MIMAT0000231_st	20500399	hsa-miR-199a-5p	-63.55	5.15e-05	0.0023	MIMAT0000231
MIMAT0000250_st	20500432	hsa-miR-139-5p	-66.67	6.97e-05	0.0027	MIMAT0000250
MIMAT0000435_st	20500752	hsa-miR-143-3p	-83.47	0.0002	0.0046	MIMAT0000435
