# Supplementary material for: MicroRNA Expression Profiling in Behçet's Disease
Source: J Immunol Res. 2018 May 7;2018:2405150. doi: 10.1155/2018/2405150 (PMC5964440; doi:10.1155/2018/2405150)
Supplement: Supplementary 2 — Supplementary Table 2: pathways enriched in genes targeted by modulated miRNAs in BD. [file 2405150.f2.xlsx]

## Sheet: Foglio1
Suplementary table 2. Pathways enriched in modulated miRNAs in BD.
Pathway	-log10 (p-value)
3-phosphoinositide degradation	2.17312
a6b1 and a6b4 Integrin signaling	2.47483
Activated TLR4 signalling	4.49634
Activation of BH3-only proteins	2.70289
Activation of BIM and translocation to mitochondria	2.73411
Activation of NMDA receptor upon glutamate binding and postsynaptic events	3.69957
ALK1 pathway	22.2611
ALK1 signaling events	22.8639
Alpha6Beta4Integrin	2.9029
Alpha9 beta1 integrin signaling events	38.2877
Androgen-mediated signaling	5.27447
AndrogenReceptor	4.35566
AP-1 transcription factor network	23.6558
Arf6 downstream pathway	37.9714
Arf6 signaling events	37.9714
Arf6 trafficking events	37.9714
ARMS-mediated activation	3.08123
Asparagine N-linked glycosylation	2.98132
ATF-2 transcription factor network	7.37891
ATM pathway	7.29987
ATR signaling pathway	6.45763
Aurora A signaling	2.54198
Axon guidance	13.849
BCR signaling pathway	2.19311
Beta1 integrin cell surface interactions	39.5061
Beta3 integrin cell surface interactions	3.33336
BMAL1:CLOCK/NPAS2 Activates Gene Expression	2.93824
BMP receptor signaling	17.3369
Ca-dependent events	2.55984
Calcineurin-regulated NFAT-dependent transcription in lymphocytes	2.74531
Calcium signaling in the CD4+ TCR pathway	2.6568
Canonical NF-kappaB pathway	2.04749
Canonical Wnt signaling pathway	7.39272
CD28 co-stimulation	2.30601
CDC42 signaling events	29.7179
Cell-Cell communication	2.15882
Cellular roles of Anthrax toxin	2.59805
Ceramide signaling pathway	2.35624
Circadian Clock	2.55686
Class I PI3K signaling events	37.9714
Class I PI3K signaling events mediated by Akt	37.9714
C-MYB transcription factor network	3.13744
C-MYC pathway	2.93227
Costimulation by the CD28 family	2.31915
CREB phosphorylation through the activation of CaMKK	2.07314
CREB phosphorylation through the activation of Ras	3.44715
CRMPs in Sema3A signaling	2.33623
CXCR4-mediated signaling events	7.69674
Cyclin D associated events in G1	2.27341
DAG and IP3 signaling	2.06967
Degradation of beta catenin	4.70569
Developmental Biology	8.26891
Direct p53 effectors	6.39814
Downstream signal transduction	4.42295
Downstream signaling of activated FGFR	5.1451
Downstream TCR signaling	2.10335
E2F transcription factor network	4.32719
E-cadherin signaling events	13.8748
E-cadherin signaling in the nascent adherens junction	13.028
EGF receptor (ErbB1) signaling pathway	37.9714
EGFR interacts with phospholipase C-gamma	2.17187
EGFR1	8.04829
EGFR-dependent Endothelin signaling events	38.1891
Endothelins	39.4045
Energy dependent regulation of mTOR by LKB1-AMPK	2.07748
EPHB forward signaling	3.43637
EphrinA-EPHA pathway	2.44864
EphrinB-EPHB pathway	2.70486
Epithelial-to-mesenchymal transition	5.91268
EPO signaling pathway	3.15381
ErbB receptor signaling network	39.5995
ErbB1 downstream signaling	37.9714
ErbB2/ErbB3 signaling events	3.87386
ErbB4 signaling events	2.55686
FAS (CD95) signaling pathway	4.24984
Fc-epsilon receptor I signaling in mast cells	3.33126
FGF signaling pathway	4.32108
FOXM1 transcription factor network	2.60621
FoxO family signaling	8.50933
Frs2-mediated activation	3.46985
FRS2-mediated cascade	4.30062
G alpha (12/13) signalling events	2.2694
G alpha (s) signalling events	4.51135
G1 Phase	2.27341
GAB1 signalosome	2.10335
Glypican 1 network	38.6742
Glypican 3 network	10.8108
Glypican pathway	41.0924
GMCSF-mediated signaling events	37.491
G-protein mediated events	2.10138
GRB2 events in EGFR signaling	3.40245
Hedgehog signaling events mediated by Gli proteins	2.49756
HIF-2-alpha transcription factor network	4.29449
Hypoxic and oxygen homeostasis regulation of HIF-1-alpha	2.95202
IFN-gamma pathway	38.359
IGF1 pathway	38.2861
IL12-mediated signaling events	2.67448
IL1-mediated signaling events	13.4171
IL2 signaling events mediated by PI3K	4.48148
IL2 signaling events mediated by STAT5	2.35755
IL2-mediated signaling events	7.65033
IL3-mediated signaling events	37.1336
IL4-mediated signaling events	2.12004
IL5-mediated signaling events	37.491
IL6-mediated signaling events	5.70469
Insulin Pathway	37.9714
Insulin receptor signalling cascade	8.28676
Insulin-mediated glucose transport	3.79396
Integration of energy metabolism	2.31155
Integrin family cell surface interactions	37.6522
Integrin-linked kinase signaling	23.5751
Integrins in angiogenesis	5.05291
Interaction between L1 and Ankyrins	2.18164
Interleukin-1 signaling	4.19832
Internalization of ErbB1	37.9714
Intrinsic Pathway for Apoptosis	3.28578
IRAK1 recruits IKK complex	4.05042
IRAK1 recruits IKK complex upon TLR7/8 or 9 stimulation	4.05042
IRS-mediated signalling	7.81467
IRS-related events	7.86345
JNK (c-Jun kinases) phosphorylation and activation mediated by activated human TAK1	2.55703
JNK signaling in the CD4+ TCR pathway	4.61136
KitReceptor	2.79151
L1CAM interactions	5.98866
LKB1 signaling events	38.9415
LPA receptor mediated events	6.26547
LPA4-mediated signaling events	3.02646
MAP kinase activation in TLR cascade	5.56465
MAPK targets/ Nuclear events mediated by MAP kinases	2.85611
mTOR signaling pathway	37.9714
mTOR signalling	3.71968
MyD88 cascade initiated on plasma membrane	6.1698
MyD88 dependent cascade initiated on endosome	5.92787
MyD88:Mal cascade initiated on plasma membrane	5.47283
MyD88-independent cascade initiated on plasma membrane	3.39174
NADE modulates death signalling	2.18717
N-cadherin signaling events	13.1355
NCAM signaling for neurite out-growth	6.08936
NCAM1 interactions	2.36605
Nectin adhesion pathway	38.1413
Netrin mediated repulsion signals	3.40245
Netrin-1 signaling	2.97087
Netrin-mediated signaling events	3.06
Neurofascin interactions	2.51896
Neuronal System	5.88574
Neurophilin interactions with VEGF and VEGFR	2.18717
Neurotransmitter Receptor Binding And Downstream Transmission In The Postsynaptic Cell	5.52442
Neurotrophic factor-mediated Trk receptor signaling	10.1426
NFkB and MAP kinases activation mediated by TLR4 signaling repertoire	3.63228
NGF signalling via TRKA from the plasma membrane	6.81881
N-glycan antennae elongation in the medial/trans-Golgi	2.18164
NOD1/2 Signaling Pathway	2.78077
Noncanonical Wnt signaling pathway	8.46254
NOTCH	2.38244
Notch signaling pathway	5.54218
Notch-mediated HES/HEY network	5.54218
Nucleotide-binding domain, leucine rich repeat containing receptor (NLR) signaling pathways	2.06173
Opioid Signalling	2.55132
Other semaphorin interactions	2.33623
p38 MAPK signaling pathway	14.4232
p38 signaling mediated by MAPKAP kinases	2.85611
p53 pathway	8.21036
p63 transcription factor network	2.98272
p75(NTR)-mediated signaling	12.1991
p75NTR regulates axonogenesis	2.07508
PAR1-mediated thrombin signaling events	39.3571
PDGF receptor signaling network	38.0444
PDGFR-alpha signaling pathway	2.85611
PDGFR-beta signaling pathway	37.9714
Phospholipase C-mediated cascade	2.06967
PI3K Cascade	5.0704
PI-3K cascade	2.06967
PKB-mediated events	4.08105
Plasma membrane estrogen receptor signaling	40.1437
Platelet homeostasis	2.50658
PLC-gamma1 signalling	2.4574
PLK1 signaling events	2.79385
Polo-like kinase signaling events in the cell cycle	3.15831
Post NMDA receptor activation events	3.69957
Posttranslational regulation of adherens junction stability and dissassembly	11.7763
Presenilin action in Notch and Wnt signaling	8.08678
Prolonged ERK activation events	3.14475
Prostacyclin signalling through prostacyclin receptor	2.18717
Proteoglycan syndecan-mediated signaling events	38.8784
RAC1 signaling pathway	12.7399
RAF/MAP kinase cascade	2.53449
Rap1 signalling	2.11848
Ras signaling in the CD4+ TCR pathway	4.05121
Recycling pathway of L1	2.55686
Reduction of cytosolic Ca++ levels	2.11848
Reelin signaling pathway	6.80535
Regulation of Androgen receptor activity	4.2517
Regulation of CDC42 activity	30.9226
Regulation of cytoplasmic and nuclear SMAD2/3 signaling	22.643
Regulation of KIT signaling	2.51896
Regulation of nuclear beta catenin signaling and target gene transcription	4.97716
Regulation of nuclear SMAD2/3 signaling	22.643
Regulation of p38-alpha and p38-beta	13.5877
Regulation of RAC1 activity	12.7399
Regulation of retinoblastoma protein	3.77908
Regulation of RhoA activity	12.7399
Retinoic acid receptors-mediated signaling	4.01703
RhoA signaling pathway	12.7399
Role of Calcineurin-dependent NFAT signaling in lymphocytes	8.77455
Role of DCC in regulating apoptosis	2.07508
RXR and RAR heterodimerization with other nuclear receptor	3.36667
S1P1 pathway	37.9714
S1P2 pathway	2.78077
Semaphorin interactions	3.6825
SHC1 events in EGFR signaling	3.02646
SHC-mediated signalling	3.40045
SHC-related events	3.02646
Signal transduction by L1	4.0316
Signaling by BMP	3.46985
Signaling by EGFR	5.73154
Signaling by FGFR	5.37567
Signaling by Insulin receptor	4.61416
Signaling by Interleukins	3.50859
Signaling by Notch	2.85611
Signaling by PDGF	4.78244
Signaling by SCF-KIT	4.66467
Signaling by TGF beta	2.577
Signaling events mediated by focal adhesion kinase	37.9714
Signaling events mediated by HDAC Class I	4.66302
Signaling events mediated by HDAC Class II	3.34205
Signaling events mediated by Hepatocyte Growth Factor Receptor (c-Met)	38.3831
Signaling events mediated by Stem cell factor receptor (c-Kit)	4.50277
Signaling events mediated by TCPTP	4.23011
Signaling events mediated by the Hedgehog family	3.52492
Signaling events mediated by VEGFR1 and VEGFR2	39.0397
Signaling events regulated by Ret tyrosine kinase	4.13534
Signaling mediated by p38-alpha and p38-beta	5.5184
Signalling by NGF	8.06602
Signalling to ERKs	3.52972
Signalling to p38 via RIT and RIN	2.33623
Signalling to RAS	2.85611
SOS-mediated signalling	4.30062
Sphingolipid metabolism	2.6568
Sphingosine 1-phosphate (S1P) pathway	39.2577
Stabilization and expansion of the E-cadherin adherens junction	13.028
Syndecan-1-mediated signaling events	37.8773
Syndecan-2-mediated signaling events	4.51861
Syndecan-4-mediated signaling events	8.03256
TCR signaling	2.25834
TCR signaling in na&#xef;ve CD4+ T cells	7.17103
TCR signaling in na&#xef;ve CD8+ T cells	2.55251
TGF-beta receptor signaling	22.643
TGFBR	11.6739
Thrombin/protease-activated receptor (PAR) pathway	39.2345
TNF alpha/NF-kB	2.39718
TNF receptor signaling pathway	16.25
Toll Like Receptor 10 (TLR10) Cascade	5.92787
Toll Like Receptor 2 (TLR2) Cascade	4.85502
Toll Like Receptor 3 (TLR3) Cascade	3.29444
Toll Like Receptor 4 (TLR4) Cascade	4.25986
Toll Like Receptor 5 (TLR5) Cascade	5.92787
Toll Like Receptor 7/8 (TLR7/8) Cascade	5.47283
Toll Like Receptor 9 (TLR9) Cascade	5.3494
Toll Like Receptor TLR1:TLR2 Cascade	5.05291
Toll Like Receptor TLR6:TLR2 Cascade	5.05291
Toll Receptor Cascades	2.76924
TRAF6 mediated induction of NFkB and MAP kinases upon TLR7/8 or 9 activation	6.1698
TRAF6 Mediated Induction of proinflammatory cytokines	3.9088
TRAIL signaling pathway	38.5591
Transcriptional Regulation of White Adipocyte Differentiation	2.6075
Transmission across Chemical Synapses	5.03648
TRIF mediated TLR3 signaling	3.29444
Trk receptor signaling mediated by PI3K and PLC-gamma	8.81459
Trk receptor signaling mediated by the MAPK pathway	4.94015
Urokinase-type plasminogen activator (uPA) and uPAR-mediated signaling	37.9714
Validated targets of C-MYC transcriptional activation	2.22427
Validated transcriptional targets of deltaNp63 isoforms	2.21219
VEGF and VEGFR signaling network	39.7728
VEGFR1 specific signals	4.45011
VEGFR3 signaling in lymphatic endothelium	4.3446
Wnt	5.88543
Wnt signaling network	10.113
