# Supplementary material for: MicroRNA Expression Profiling in Behçet's Disease
Source: J Immunol Res. 2018 May 7;2018:2405150. doi: 10.1155/2018/2405150 (PMC5964440; doi:10.1155/2018/2405150)
Supplement: Supplementary 3 — Supplementary Table 3: pathways enriched in differentially expressed genes in BD. [file 2405150.f3.xlsx]

## Sheet: Foglio1
Supplementary table 3. Pathways enriched in modulated genes in BD
Pathways	-log10 (p-value)
Proteoglycan syndecan-mediated signaling events	22.1584
IFN-gamma pathway	21.3032
LKB1 signaling events	21.1168
ErbB receptor signaling network	21.0705
TRAIL signaling pathway	20.8107
Arf6 downstream pathway	20.6237
Arf6 signaling events	20.6237
Arf6 trafficking events	20.6237
Class I PI3K signaling events	20.6237
Class I PI3K signaling events mediated by Akt	20.6237
EGF receptor (ErbB1) signaling pathway	20.6237
ErbB1 downstream signaling	20.6237
Insulin Pathway	20.6237
Internalization of ErbB1	20.6237
mTOR signaling pathway	20.6237
PDGFR-beta signaling pathway	20.6237
S1P1 pathway	20.6237
Signaling events mediated by focal adhesion kinase	20.6237
Urokinase-type plasminogen activator (uPA) and uPAR-mediated signaling	20.6237
EGFR-dependent Endothelin signaling events	20.6083
IGF1 pathway	20.5777
GMCSF-mediated signaling events	20.5623
IL5-mediated signaling events	20.5623
PDGF receptor signaling network	20.547
Signaling events mediated by Hepatocyte Growth Factor Receptor (c-Met)	20.547
IL3-mediated signaling events	20.5165
Nectin adhesion pathway	20.5165
Signaling events mediated by VEGFR1 and VEGFR2	20.5012
Beta1 integrin cell surface interactions	20.4657
Glypican 1 network	20.4555
PAR1-mediated thrombin signaling events	20.4555
Syndecan-1-mediated signaling events	20.4403
Thrombin/protease-activated receptor (PAR) pathway	20.4403
Plasma membrane estrogen receptor signaling	20.4251
VEGF and VEGFR signaling network	20.3797
Alpha9 beta1 integrin signaling events	20.3645
Endothelins	20.3343
Sphingosine 1-phosphate (S1P) pathway	20.2741
Integrin family cell surface interactions	20.0698
Glypican pathway	19.8732
Immune System	18.8684
AP-1 transcription factor network	16.5442
CDC42 signaling events	16.4662
Regulation of CDC42 activity	16.2265
Integrin-linked kinase signaling	15.8654
IL1-mediated signaling events	13.3409
IL12-mediated signaling events	13.0368
IL23-mediated signaling events	12.1199
CXCR4-mediated signaling events	11.7207
Cytokine Signaling in Immune system	11.6102
Validated transcriptional targets of AP1 family members Fra1 and Fra2	10.6453
TNF receptor signaling pathway	10.4171
Endogenous TLR signaling	8.64513
TCR signaling in na&#xef;ve CD4+ T cells	8.45832
IL2-mediated signaling events	8.06488
IL6-mediated signaling events	8.0116
Hemostasis	7.95165
Calcineurin-regulated NFAT-dependent transcription in lymphocytes	7.86177
Regulation of cytoplasmic and nuclear SMAD2/3 signaling	6.84045
Regulation of nuclear SMAD2/3 signaling	6.84045
TGF-beta receptor signaling	6.84045
Signaling by Interleukins	6.77935
p38 MAPK signaling pathway	6.75206
Role of Calcineurin-dependent NFAT signaling in lymphocytes	6.65841
TCR signaling in na&#xef;ve CD8+ T cells	6.57637
ALK1 signaling events	6.55469
Interferon Signaling	6.54173
ALK1 pathway	6.50305
Regulation of p38-alpha and p38-beta	6.47167
Interferon alpha/beta signaling	6.28739
BMP receptor signaling	5.92147
IL27-mediated signaling events	5.46664
Costimulation by the CD28 family	5.11072
Adaptive Immune System	4.91597
CD40/CD40L signaling	4.83199
Canonical NF-kappaB pathway	4.80229
Signaling events mediated by TCPTP	4.66281
Regulation of IFNA signaling	4.62267
Interleukin-1 signaling	4.5663
HIF-1-alpha transcription factor network	4.50707
BCR signaling pathway	4.4696
IL2 signaling events mediated by PI3K	4.4696
LPA receptor mediated events	4.42764
p75(NTR)-mediated signaling	4.40523
Signaling events regulated by Ret tyrosine kinase	4.39654
EGFR1	4.39213
Platelet activation, signaling and aggregation	4.39213
Interleukin-6 signaling	4.38927
Cellular roles of Anthrax toxin	4.36045
Cell surface interactions at the vascular wall	4.29132
Polo-like kinase signaling events in the cell cycle	4.18773
TCR signaling	4.16641
Nef mediated downregulation of CD28 cell surface expression	4.07939
Hypoxic and oxygen homeostasis regulation of HIF-1-alpha	4.03347
IL12 signaling mediated by STAT4	3.87069
FAS (CD95) signaling pathway	3.70781
Downstream TCR signaling	3.69985
Formation of Fibrin Clot (Clotting Cascade)	3.64683
Atypical NF-kappaB pathway	3.59395
Signaling by Aurora kinases	3.54791
Innate Immune System	3.54013
Aurora A signaling	3.52444
Downstream signaling in na&#xef;ve CD8+ T cells	3.49288
Signalling by NGF	3.45457
Common Pathway	3.41272
PLK1 signaling events	3.40868
Response to elevated platelet cytosolic Ca2+	3.36218
Nucleotide-binding domain, leucine rich repeat containing receptor (NLR) signaling pathways	3.19833
Generation of second messenger molecules	3.18335
Syndecan-2-mediated signaling events	3.15242
Nef-mediates down modulation of cell surface receptors by recruiting them to clathrin adapters	3.11569
Glucocorticoid receptor regulatory network	3.07679
Interferon gamma signaling	3.05071
FGF signaling pathway	3.01601
TGFBR	2.98697
Glucocorticoid receptor signaling	2.95776
Androgen-mediated signaling	2.89896
S1P2 pathway	2.77512
Translocation of ZAP-70 to Immunological synapse	2.77029
The role of Nef in HIV-1 replication and disease pathogenesis	2.72688
ATF-2 transcription factor network	2.68083
Platelet degranulation	2.68057
Rho GTPase cycle	2.64797
Signaling by Rho GTPases	2.64797
Calcium signaling in the CD4+ TCR pathway	2.63606
S1P3 pathway	2.63606
VEGFR1 specific signals	2.63606
Fc-epsilon receptor I signaling in mast cells	2.62756
IL4-mediated signaling events	2.60167
Metabolism of proteins	2.56706
RAC1 signaling pathway	2.5445
Regulation of RAC1 activity	2.5445
Regulation of RhoA activity	2.5445
RhoA signaling pathway	2.5445
IKK complex recruitment mediated by RIP1	2.54144
Nef Mediated CD4 Down-regulation	2.54144
Phosphorylation of CD3 and TCR zeta chains	2.54144
mRNA Splicing	2.51697
mRNA Splicing - Major Pathway	2.51697
Signaling by SCF-KIT	2.50269
Signal Transduction	2.45492
Dissolution of Fibrin Clot	2.44714
EPO signaling pathway	2.43637
Diabetes pathways	2.41944
The NLRP3 inflammasome	2.36261
PD-1 signaling	2.28604
p75 NTR receptor-mediated signalling	2.26696
amb2 Integrin signaling	2.23599
Regulation of IFNG signaling	2.21609
Chemokine receptors bind chemokines	2.17659
JNK signaling in the CD4+ TCR pathway	2.17659
Ras signaling in the CD4+ TCR pathway	2.17659
Beta3 integrin cell surface interactions	2.14808
ATM pathway	2.12815
Eukaryotic Translation Elongation	2.11218
p53 pathway	2.09874
Gene Expression	2.08662
ATR signaling pathway	2.08061
Direct p53 effectors	2.05305
Processing of Capped Intron-Containing Pre-mRNA	2.05305
Formation of annular gap junctions	2.03847
Gap junction degradation	2.03847
glutamine biosynthesis I	2.03847
Toll Receptor Cascades	2.02637
