# Supplementary material for: MicroRNA Expression Profiling in Behçet's Disease
Source: J Immunol Res. 2018 May 7;2018:2405150. doi: 10.1155/2018/2405150 (PMC5964440; doi:10.1155/2018/2405150)
Supplement: Supplementary 4 — Supplementary Table 4: pathways enriched both in genes targeted by BD deregulated miRNAs and in BD differentially expressed genes. [file 2405150.f4.xlsx]

## Sheet: Foglio1
Supplementary table 4. Pathways enriched both in BD deregulated miRNAs and in BD differentially expressed genes.
Pathways	-log10 (p-value)
ALK1 pathway	22.2611
ALK1 signaling events	22.8639
Alpha6Beta4Integrin	2.9029
Alpha9 beta1 integrin signaling events	38.2877
Androgen-mediated signaling	5.27447
AP-1 transcription factor network	23.6558
Arf6 downstream pathway	37.9714
Arf6 signaling events	37.9714
Arf6 trafficking events	37.9714
ATF-2 transcription factor network	7.37891
ATM pathway	7.29987
ATR signaling pathway	6.45763
Aurora A signaling	2.54198
BCR signaling pathway	2.19311
Beta1 integrin cell surface interactions	39.5061
Beta3 integrin cell surface interactions	3.33336
BMP receptor signaling	17.3369
Calcineurin-regulated NFAT-dependent transcription in lymphocytes	2.74531
Calcium signaling in the CD4+ TCR pathway	2.6568
Canonical NF-kappaB pathway	2.04749
CDC42 signaling events	29.7179
Cellular roles of Anthrax toxin	2.59805
Class I PI3K signaling events	37.9714
Class I PI3K signaling events mediated by Akt	37.9714
Costimulation by the CD28 family	2.31915
CXCR4-mediated signaling events	7.69674
Direct p53 effectors	6.39814
Downstream TCR signaling	2.10335
EGF receptor (ErbB1) signaling pathway	37.9714
EGFR1	8.04829
EGFR-dependent Endothelin signaling events	38.1891
Endothelins	39.4045
ErbB receptor signaling network	39.5995
ErbB1 downstream signaling	37.9714
FAS (CD95) signaling pathway	4.24984
Fc-epsilon receptor I signaling in mast cells	3.33126
FGF signaling pathway	4.32108
Glypican 1 network	38.6742
Glypican pathway	41.0924
GMCSF-mediated signaling events	37.491
Hypoxic and oxygen homeostasis regulation of HIF-1-alpha	2.95202
IFN-gamma pathway	38.359
IGF1 pathway	38.2861
IL12-mediated signaling events	2.67448
IL1-mediated signaling events	13.4171
IL2 signaling events mediated by PI3K	4.48148
IL2-mediated signaling events	7.65033
IL3-mediated signaling events	37.1336
IL4-mediated signaling events	2.12004
IL5-mediated signaling events	37.491
IL6-mediated signaling events	5.70469
Insulin Pathway	37.9714
Integrin family cell surface interactions	37.6522
Integrin-linked kinase signaling	23.5751
Interleukin-1 signaling	4.19832
Internalization of ErbB1	37.9714
JNK signaling in the CD4+ TCR pathway	4.61136
LKB1 signaling events	38.9415
LPA receptor mediated events	6.26547
mTOR signaling pathway	37.9714
Nectin adhesion pathway	38.1413
Nucleotide-binding domain, leucine rich repeat containing receptor (NLR) signaling pathways	2.06173
p38 MAPK signaling pathway	14.4232
p53 pathway	8.21036
p75(NTR)-mediated signaling	12.1991
PAR1-mediated thrombin signaling events	39.3571
PDGF receptor signaling network	38.0444
PDGFR-beta signaling pathway	37.9714
Plasma membrane estrogen receptor signaling	40.1437
PLK1 signaling events	2.79385
Polo-like kinase signaling events in the cell cycle	3.15831
Proteoglycan syndecan-mediated signaling events	38.8784
RAC1 signaling pathway	12.7399
Ras signaling in the CD4+ TCR pathway	4.05121
Regulation of CDC42 activity	30.9226
Regulation of cytoplasmic and nuclear SMAD2/3 signaling	22.643
Regulation of nuclear SMAD2/3 signaling	22.643
Regulation of p38-alpha and p38-beta	13.5877
Regulation of RAC1 activity	12.7399
Regulation of RhoA activity	12.7399
RhoA signaling pathway	12.7399
Role of Calcineurin-dependent NFAT signaling in lymphocytes	8.77455
S1P1 pathway	37.9714
S1P2 pathway	2.78077
Signaling by Interleukins	3.50859
Signaling by SCF-KIT	4.66467
Signaling events mediated by focal adhesion kinase	37.9714
Signaling events mediated by Hepatocyte Growth Factor Receptor (c-Met)	38.3831
Signaling events mediated by TCPTP	4.23011
Signaling events mediated by VEGFR1 and VEGFR2	39.0397
Signaling events regulated by Ret tyrosine kinase	4.13534
Sphingosine 1-phosphate (S1P) pathway	39.2577
Syndecan-1-mediated signaling events	37.8773
Syndecan-2-mediated signaling events	4.51861
TCR signaling	2.25834
TCR signaling in na&#xef;ve CD4+ T cells	7.17103
TCR signaling in na&#xef;ve CD8+ T cells	2.55251
TGF-beta receptor signaling	22.643
TGFBR	11.6739
Thrombin/protease-activated receptor (PAR) pathway	39.2345
TNF receptor signaling pathway	16.25
Toll Receptor Cascades	2.76924
TRAIL signaling pathway	38.5591
Urokinase-type plasminogen activator (uPA) and uPAR-mediated signaling	37.9714
VEGF and VEGFR signaling network	39.7728
VEGFR1 specific signals	4.45011
