# Supplementary material for: MicroRNA Expression Profiling in Behçet's Disease
Source: J Immunol Res. 2018 May 7;2018:2405150. doi: 10.1155/2018/2405150 (PMC5964440; doi:10.1155/2018/2405150)
Supplement: Supplementary 5 — Supplementary Table 5: differentially expressed genes in BD that were included in the six clusters. [file 2405150.f5.xlsx]

## Sheet: Foglio1
Supplementary table 5. Differentially expressed genes included in the six clusters.
CL1	CL2	CL3	CL4	CL5	CL6
ACTB	ARF3	BTG2	ARHGDIA	AGFG1	ACTR2
BCL2L11	CCRL2	DDX3X	ATRX	DNAJB1	DDX17
CA2	CSF3R	DDX6	BLNK	ENO1	ERAP1
CALM1	EZR	DHX9	CD28	FUS	NKTR
CCL2	FOSL2	DUSP2	DGKA	GPX3	RPL27A
CCL20	GLUL	GNAI2	HHEX	NR4A2	SRPR
CCL3	HSP90B1	HIPK1	IKZF1	RHOB	SRSF5
CCR1	IFIT2	IKZF3	INPP4A	YY1
CCR2	IL10	KAT6A	PGK1
CD3E	IL1B	PLK2	STK4
CD4	IL8	RBL2
CD83	NAMPT	TEP1
CTLA4	NR4A1	ZNF652
CXCL1	OLR1
CXCL2	PIK3R1
CXCL3	PROS1
CXCR4	PTGER4
DUSP1	SERPINA1
EGR1	TCF3
HSPA4	TFPI
HSPD1	THBD
ICAM1	TLR4
IKBKB	TNF
IL1A	TNFAIP6
IL1R2	TOP1
IL1RN
IL6R
IRF5
JUN
JUND
MCL1
MLL
MMP8
NLRP3
PLAUR
REL
S100A8
SERPINB2
SOCS1
SOCS3
STAT1
STAT2
THBS1
TLR2
TNFAIP3
TREM1
TXN
VEGFA
