# Supplementary material for: MicroRNA Expression Profiling in Behçet's Disease
Source: J Immunol Res. 2018 May 7;2018:2405150. doi: 10.1155/2018/2405150 (PMC5964440; doi:10.1155/2018/2405150)
Supplement: Supplementary 6 — Supplementary Table 6: differentially expressed genes in BD that were included in clusters that are targeted by modulated miRNAs in BD. [file 2405150.f6.xlsx]

## Sheet: Foglio1
Supplementary table 6. BD DEGs included in clusters that are targeted by modulated miRNAs in BD
CL1	CL2	CL3	CL4	CL5	CL6
BCL2L11	ARF3	BTG2	ARHGDIA	DNAJB1	ACTR2
CALM1	FOSL2	DDX3X	CD28	NR4A2	ERAP1
CCL3	HSP90B1	DDX6	DGKA	RHOB	NKTR
CD4	IL10	DUSP2	IKZF1	YY1
CTLA4	NAMPT	GNAI2	INPP4A
CXCL2	OLR1	HIPK1	PGK1
CXCR4	PIK3R1	IKZF3	STK4
DUSP1	PTGER4	KAT6A
EGR1	TCF3	PLK2
HSPA4	THBD	RBL2
HSPD1	TNF
IKBKB
IL1A
IL6R
JUN
MCL1
MLL
MMP8
NLRP3
REL
S100A8
SOCS1
SOCS3
STAT1
STAT2
THBS1
TLR2
TNFAIP3
VEGFA
