# Supplementary material for: MicroRNA Expression Profiling in Behçet's Disease
Source: J Immunol Res. 2018 May 7;2018:2405150. doi: 10.1155/2018/2405150 (PMC5964440; doi:10.1155/2018/2405150)
Supplement: Supplementary 7 — Supplementary Table 7: enriched pathways in target genes that are included in clusters. [file 2405150.f7.xlsx]

## Sheet: analysis
Supplementary table 7. Enriched pathways in target genes that are included in clusters
PANTHER Pathways	p-value
CL1
Toll receptor signaling pathway (P00054)	8.44e-07
Apoptosis signaling pathway (P00006)	2.34e-05
Inflammation mediated by chemokine and cytokine signaling pathway (P00031)	3.09e-05
Interleukin signaling pathway (P00036)	0.000168
PDGF signaling pathway (P00047)	0.00114
Oxidative stress response (P00046)	0.00146
CCKR signaling map (P06959)	0.00153
B cell activation (P00010)	0.0018
T cell activation (P00053)	0.00349
JAK/STAT signaling pathway (P00038)	0.00381
Angiogenesis (P00005)	0.0179
CL2
Gonadotropin-releasing hormone receptor pathway (P06664)	0.000257
Wnt signaling pathway (P00057)	0.012
Hypoxia response via HIF activation (P00030)	0.0187
Axon guidance mediated by netrin (P00009)	0.0198
Blood coagulation (P00011)	0.0203
Insulin/IGF pathway-protein kinase B signaling cascade (P00033)	0.0231
p53 pathway feedback loops 2 (P04398)	0.0287
PI3 kinase pathway (P00048)	0.0315
VEGF signaling pathway (P00056)	0.0364
Endothelin signaling pathway (P00019)	0.0441
T cell activation (P00053)	0.0474
p53 pathway (P00059)	0.049
CL3
Opioid prodynorphin pathway (P05916)	0.0156
Enkephalin release (P05913)	0.0156
Opioid proopiomelanocortin pathway (P05917)	0.016
Opioid proenkephalin pathway (P05915)	0.016
5HT1 type receptor mediated signaling pathway (P04373)	0.0207
Metabotropic glutamate receptor group II pathway (P00040)	0.0216
Dopamine receptor mediated signaling pathway (P05912)	0.0235
PI3 kinase pathway (P00048)	0.0263
Oxidative stress response (P00046)	0.0272
Muscarinic acetylcholine receptor 2 and 4 signaling pathway (P00043)	0.0277
Metabotropic glutamate receptor group III pathway (P00039)	0.0282
CL4
Glycolysis (P00024)	0.00663
T cell activation (P00053)	0.0279
CL5
Axon guidance mediated by Slit/Robo	0.00418
Ras Pathway	0.0134
Cytoskeletal regulation by Rho GTPase	0.0151
PDGF signaling pathway	0.0271
Angiogenesis	0.0303
Integrin signalling pathway	0.0304
CL6
Alzheimer disease-presenilin pathway (P00004)	0.0156
Huntington disease (P00029)	0.0191
Cadherin signaling pathway (P00012)	0.021
